# Supplementary material for: Vital-sign circadian rhythms in patients prior to discharge from an ICU: a retrospective observational analysis of routinely recorded physiological data
Source: Springer Nature journal article supplement (doi:10.1186/s13054-020-02861-2), 2020-04-28

## ADDITIONAL FILE 3

# Vital-sign circadian rhythms in patients prior to discharge from an ICU: A retrospective observational analysis of routinely recorded physiological data

Shaun Davidson<sup>1\*</sup>, Mauricio Villarroel<sup>1</sup>, Mirae Harford<sup>1,2</sup>, Eoin Finnegan<sup>1</sup>, Joao Jorge<sup>1</sup>, Duncan Young<sup>2</sup>, Peter Watkinson<sup>2</sup> and Lionel Tarassenko<sup>1</sup>

\*Correspondence:

shaun.davidson@eng.ox.ac.uk

<sup>1</sup>Institute of Biomedical

Engineering, Department of

Engineering Science, University of  
Oxford, Oxford, UK

Full list of author information is  
available at the end of the article

## Admission diagnoses

Figs. 1, 2 and 3 present the 15 most common diagnosis codes for different age and gender subgroups. Note that MIMIC-III and eICU-CRD used the ICD-9 coding system for admission diagnoses, while PICRAM used the ICNARC Coding Method (ICM). All analysis of diagnosis codes in this section is performed using up to the top 3 diagnosis codes for each patient. Note that the normalised frequency plotted is the proportion of ICU admissions, not admission diagnosis codes, that match a given admission diagnosis. Thus, for up to three diagnosis codes per patient, the total sum of normalised frequency will be between 1 and 3, rather than equal to 1.

From these figures, it is apparent that the younger 15 - 44 year cohorts of both genders have notably more varied causes of admission than the older 45 - 90+ year cohorts. Men in the younger cohort had the highest prevalence of diagnosis codes related to alcohol abuse, HIV, and trauma, by a considerable margin. Thus, younger men were one of the more heterogeneous cohorts, with a higher prevalence of HIV, alcohol, and trauma-related intake codes. Older men, in contrast, were a more homogeneous cohort. Women show a less dramatic variance in cohort heterogeneity with age, and younger women, while still heterogeneous, show a lower prevalence of alcohol-related, trauma-related, or otherwise unique admission diagnosis codes than younger men. This contrast may explain the lack of a clear upward trend in mean SBP with age in men, compared to the expected upward trend in mean SBP with age observed in women.

## Author details

<sup>1</sup>Institute of Biomedical Engineering, Department of Engineering Science, University of Oxford, Oxford, UK.

<sup>2</sup>Critical Care Research Group, Nuffield Department of Clinical Neurosciences, University of Oxford, Oxford, UK.

## References

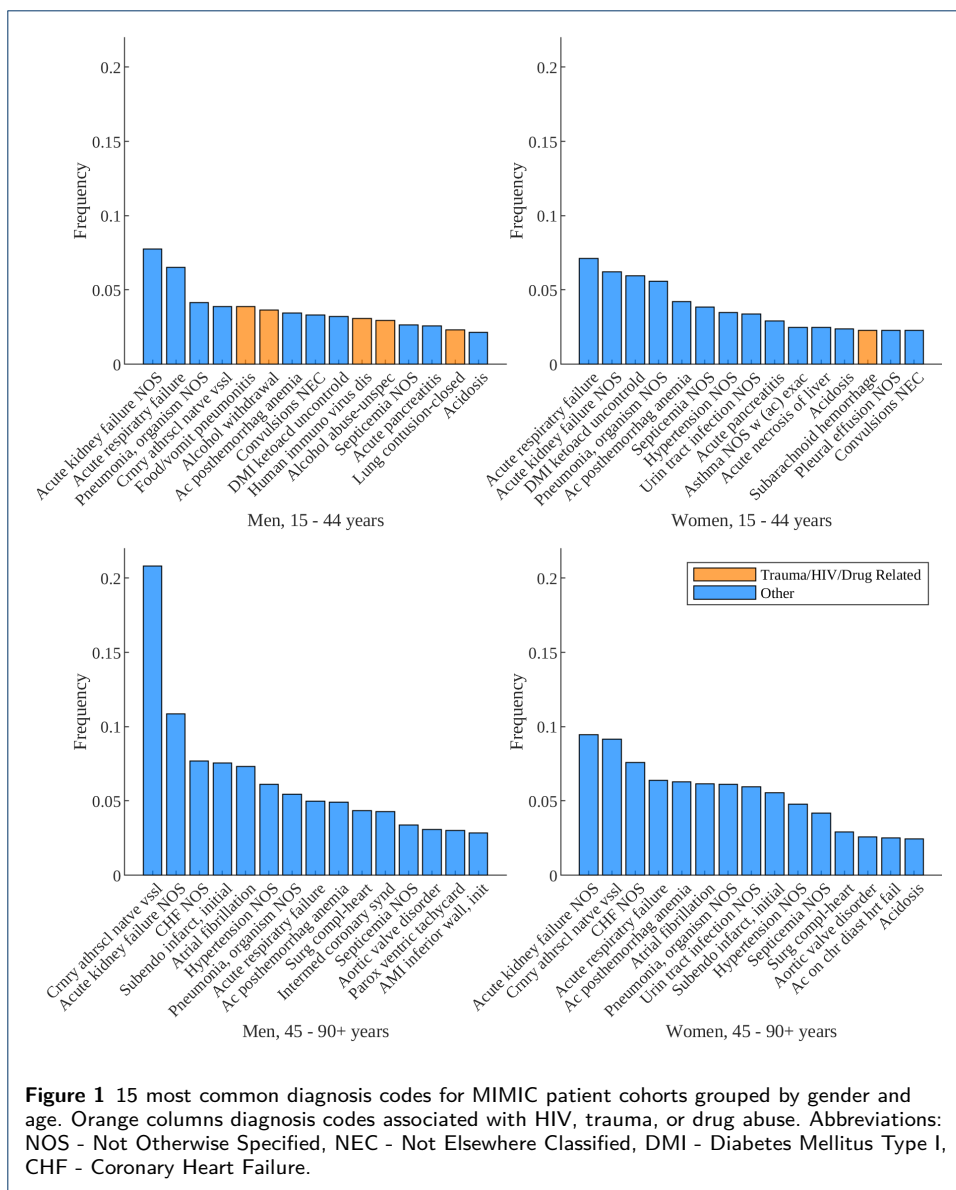

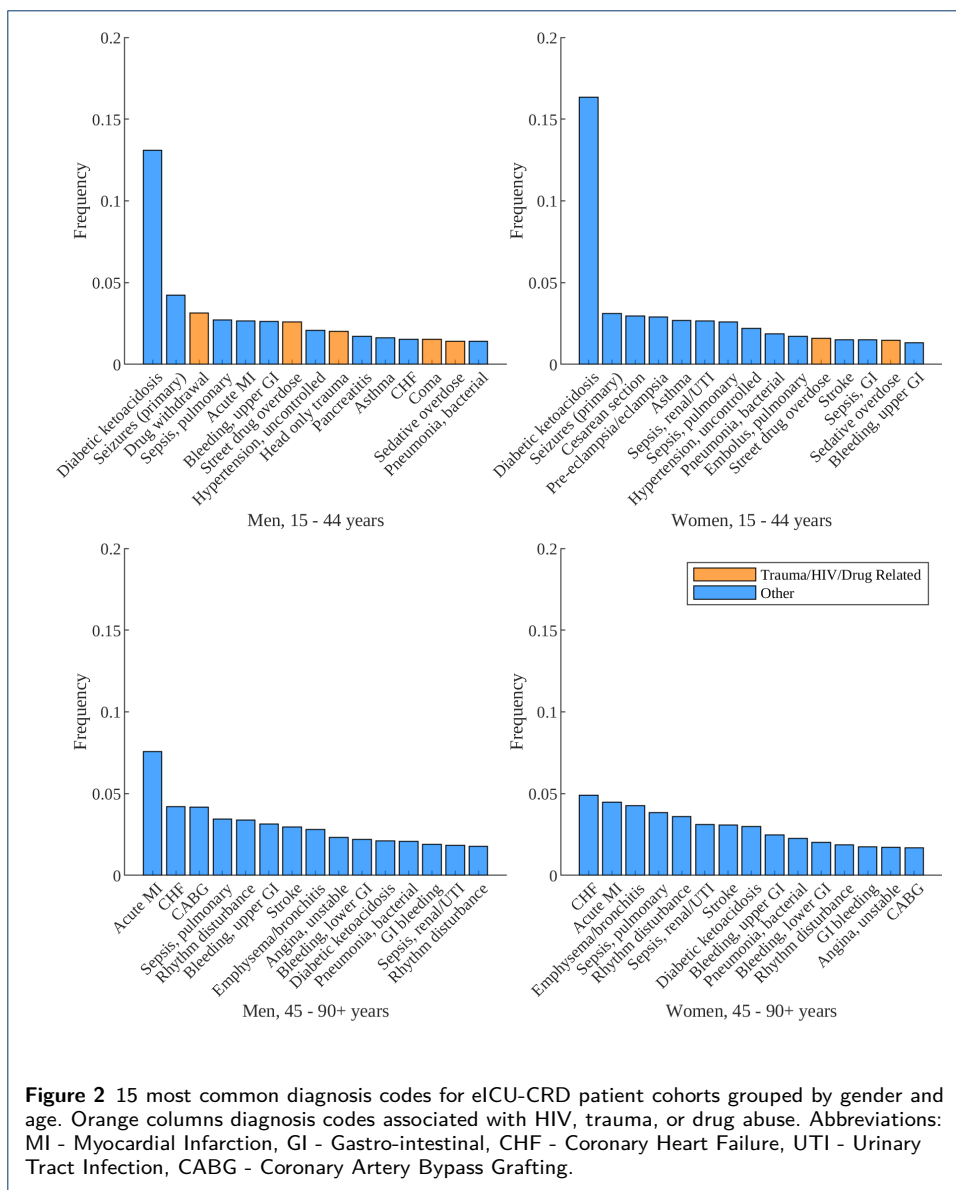

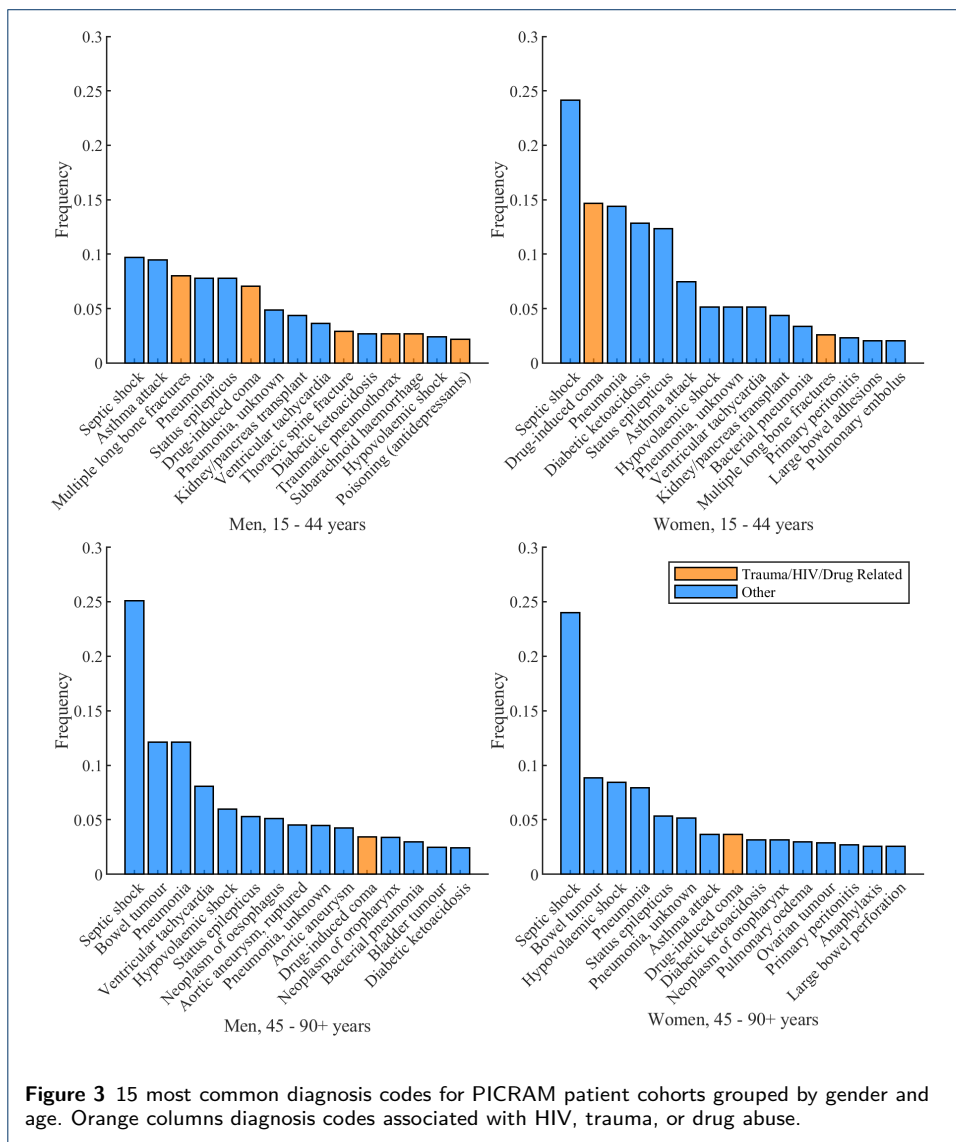

Supplement: MOESM3 [file 17937342]
